# Supplementary material
Source: MDPI journal article supplement (https://www.mdpi.com/2079-6412/13/12/2076)
Supplement: s1 [file s1 › coatings-2763368-supplementary.pdf]

## Supplementary materials

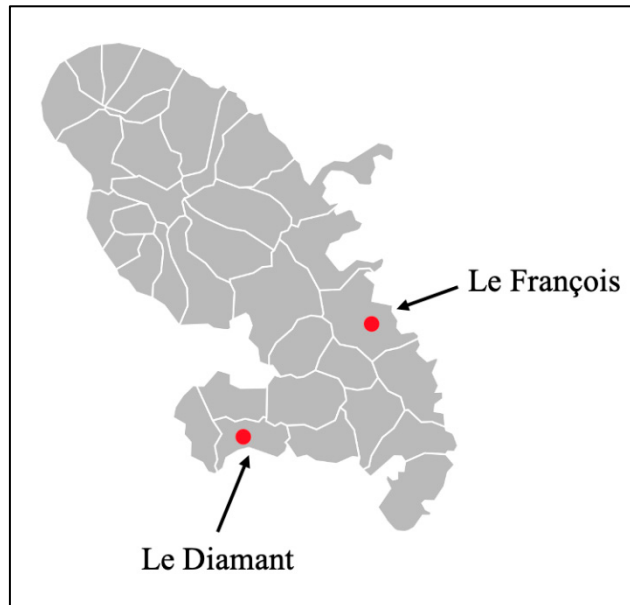

**Figure S1.** Location of the different sites studied on the map of Martinique.
